# Supplementary material
Source: publisher figshare collection journal article supplement (https://gsapubs.figshare.com/ndownloader/files/23297141)

Table DR-1. Locations within study area of Late Pleistocene alluvial and fluvial sediments related to latest Pleistocene pluvial periods#

| Location name                                                                                        | Drainage Basin | Latitude<br>Degrees S | Longitude<br>Degrees W | Reference                  |
|------------------------------------------------------------------------------------------------------|----------------|-----------------------|------------------------|----------------------------|
| A. Locations with latest Pleistocene Carbon-14 dates of organic matter                               |                |                       |                        |                            |
| Matilla                                                                                              | Chintagua      | 20.51716              | 69.34688               | Blanco and Tomlinson, 2013 |
| Matilla                                                                                              | Chintagua      | 20.51716              | 69.34688               | Blanco and Tomlinson, 2013 |
| north of Challacolla                                                                                 | Chipana        | 20.89841              | 69.33467               | Blanco and Tomlinson, 2013 |
| north of Challacolla                                                                                 | Chipana        | 20.89846              | 69.33949               | Blanco and Tomlinson, 2013 |
| north of Challacolla                                                                                 | Chipana        | 20.89849              | 69.34034               | Blanco and Tomlinson, 2013 |
| north of Challacolla                                                                                 | Chipana        | 20.90365              | 69.34179               | Nester et al. (2007)       |
| north of Challacolla                                                                                 | Chipana        | 20.90365              | 69.34179               | Nester et al. (2007)       |
| Guatacondo medial fan                                                                                | Guatacondo     | 20.99517              | 69.30124               | Blanco and Tomlinson, 2013 |
| Guatacondo medial fan                                                                                | Guatacondo     | 20.99542              | 69.30444               | Blanco and Tomlinson, 2013 |
| Maní medial fan                                                                                      | Maní           | 21.09                 | 69.32                  | Nester et al. (2007)       |
| Maní medial fan                                                                                      | Maní           | 21.09                 | 69.3                   | Gayó et al. (2012)         |
| Sipuca medial fan                                                                                    | Sipuca         | 21.23                 | 69.19                  | Nester et al. (2007)       |
| Sipuca medial fan                                                                                    | Sipuca         | 21.23                 | 69.2                   | Nester et al. (2007)       |
| Lomas de Sal                                                                                         | Tambillo       | 21.39                 | 69.42                  | Gayó et al. (2012)         |
| west of Lomas de Sal                                                                                 | Tambillo       | 21.4                  | 69.44                  | Gayó et al. (2012)         |
| Lomas de Sal                                                                                         | Tambillo       | 21.4                  | 69.42                  | Nester et al. (2007)       |
| Lomas de Sal                                                                                         | Tambillo       | 21.4                  | 69.43                  | Nester et al. (2007)       |
| Tambillo medial fan                                                                                  | Tambillo       | 21.43                 | 69.25                  | Nester et al. (2007)       |
| west of Lomas de Sal                                                                                 | Tambillo       | 21.43                 | 69.46                  | Gayó et al. (2012)         |
| west of Lomas de Sal                                                                                 | Tambillo       | 21.43                 | 69.46                  | Nester et al. (2007)       |
| Tambillo medial fan                                                                                  | Tambillo       | 21.44                 | 69.26                  | Nester et al. (2007)       |
| Tambillo distal fan                                                                                  | Tambillo       | 21.44                 | 69.31                  | Nester et al. (2007)       |
| Tambillo medial fan                                                                                  | Tambillo       | 21.44                 | 69.25                  | Nester et al. (2007)       |
| #Blanco and Tomlinson (2013) also report latest Pleistocene wetlands and salt-pan facies deposits    |                |                       |                        |                            |
| B. Locations reported to contain carbonate rhizoconcretions or other carbonate accumulations in soil |                |                       |                        |                            |
| lowest stream terrace                                                                                | Guataconda     | 20.97                 | 69.19                  | Blanco and Tomlinson, 2013 |
| lowest stream terrace                                                                                | Chipana        | 20.86                 | 69.19                  | Blanco and Tomlinson, 2013 |
| Sipuca medial fan                                                                                    | Sipuca         | 21.23                 | 69.2                   | Nester et al. (2007)       |
| Tambillo medial fan                                                                                  | Tambillo       | 21.43                 | 69.25                  | Nester et al. (2007)       |

Figure DR-1: Satellite remote sensing highlights varying amounts of gypsum in surface materials of the Pampa del Tamarugal, northern Chile. These data are from the Advanced Spaceborne Thermal Emission and Reflection Radiometer, ASTER, using bands 10, 11, and 12. Whereas the specific band ratio,  $(10 \times 12 / 11 \times 11)$ , was developed by Ninomiya et al. (2005) for recognition of quartz-rich surface materials, the inverse (the white to pale gray sectors of this image) correlate with gypsum-rich surficial deposits in northern Chile.

Ninomiya, Y. B., Fu, B., and Cudahy, T., 2005, Detecting lithology with Advanced Spaceborne Thermal Emission and Reflection Radiometer (ASTER) multispectral thermal infrared "radiance-at-sensor" data": Remote Sensing of Environment, p. 127-139.



Data Repository Figure DR-1  
Jordan et al.

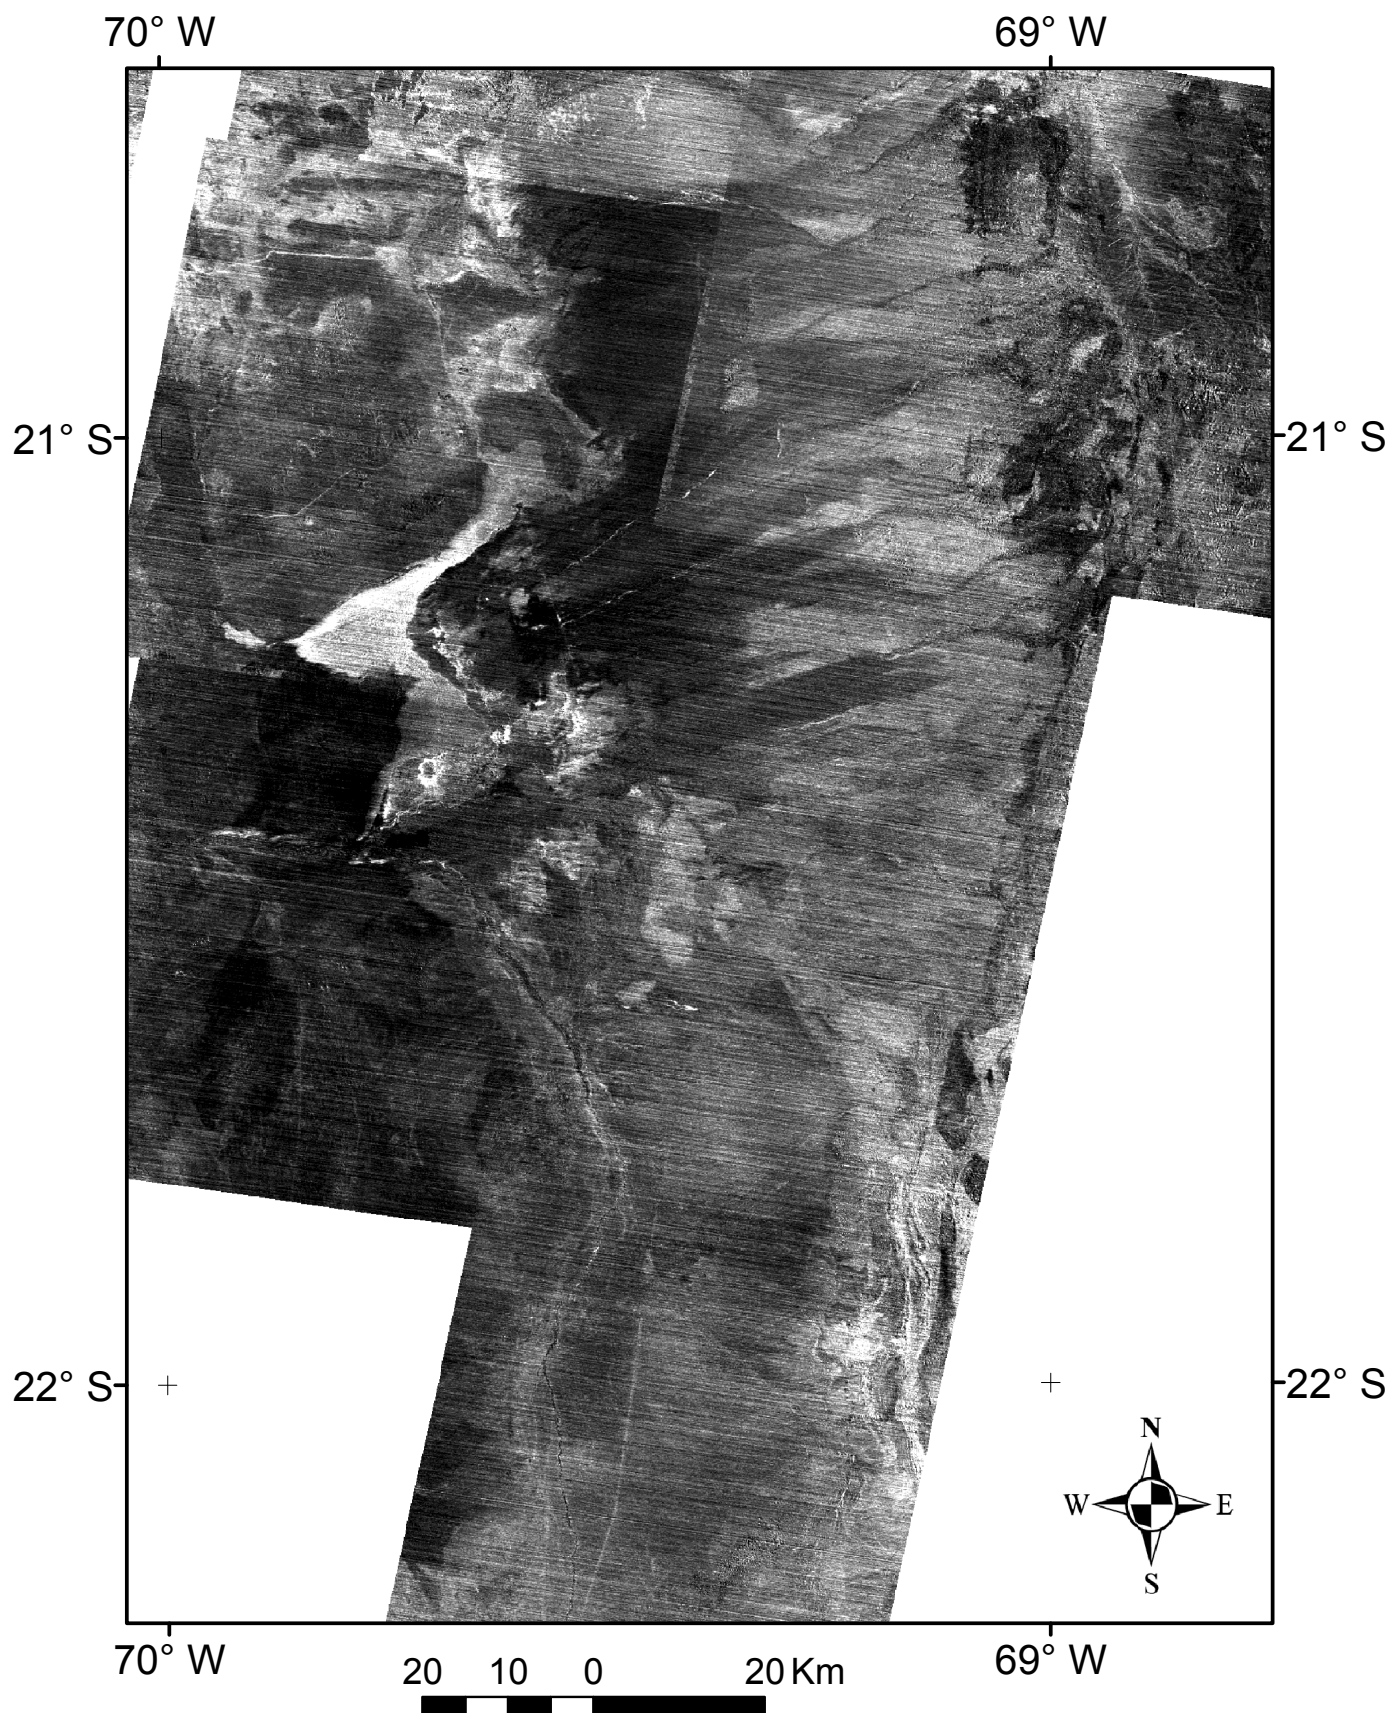

Figure DR-2: Photographs of Stage NIV geomorphic surface and materials. A) view SE of relict gravel deposits, incised ~1 m by younger channels, within the Arcas fan. The landscape is somewhat more rounded than the Stage NV landscape of Figure 6A. B) Weakly developed gypsum soil on Stage NIV surface of medial Maní fan. Rounded clasts of the parent moderately well sorted alluvium contrast with the more angular clasts of the soil, in which the angularity increases due to fracturing. Fractured clasts include gypsum and anhydrite within fractures, and sulfates also occur between the original clasts. Locations: A near 21.67°S, 69.33°W; B near 21.08°S, 69.37°W.



Data Repository Figure DR-2  
Jordan et al.

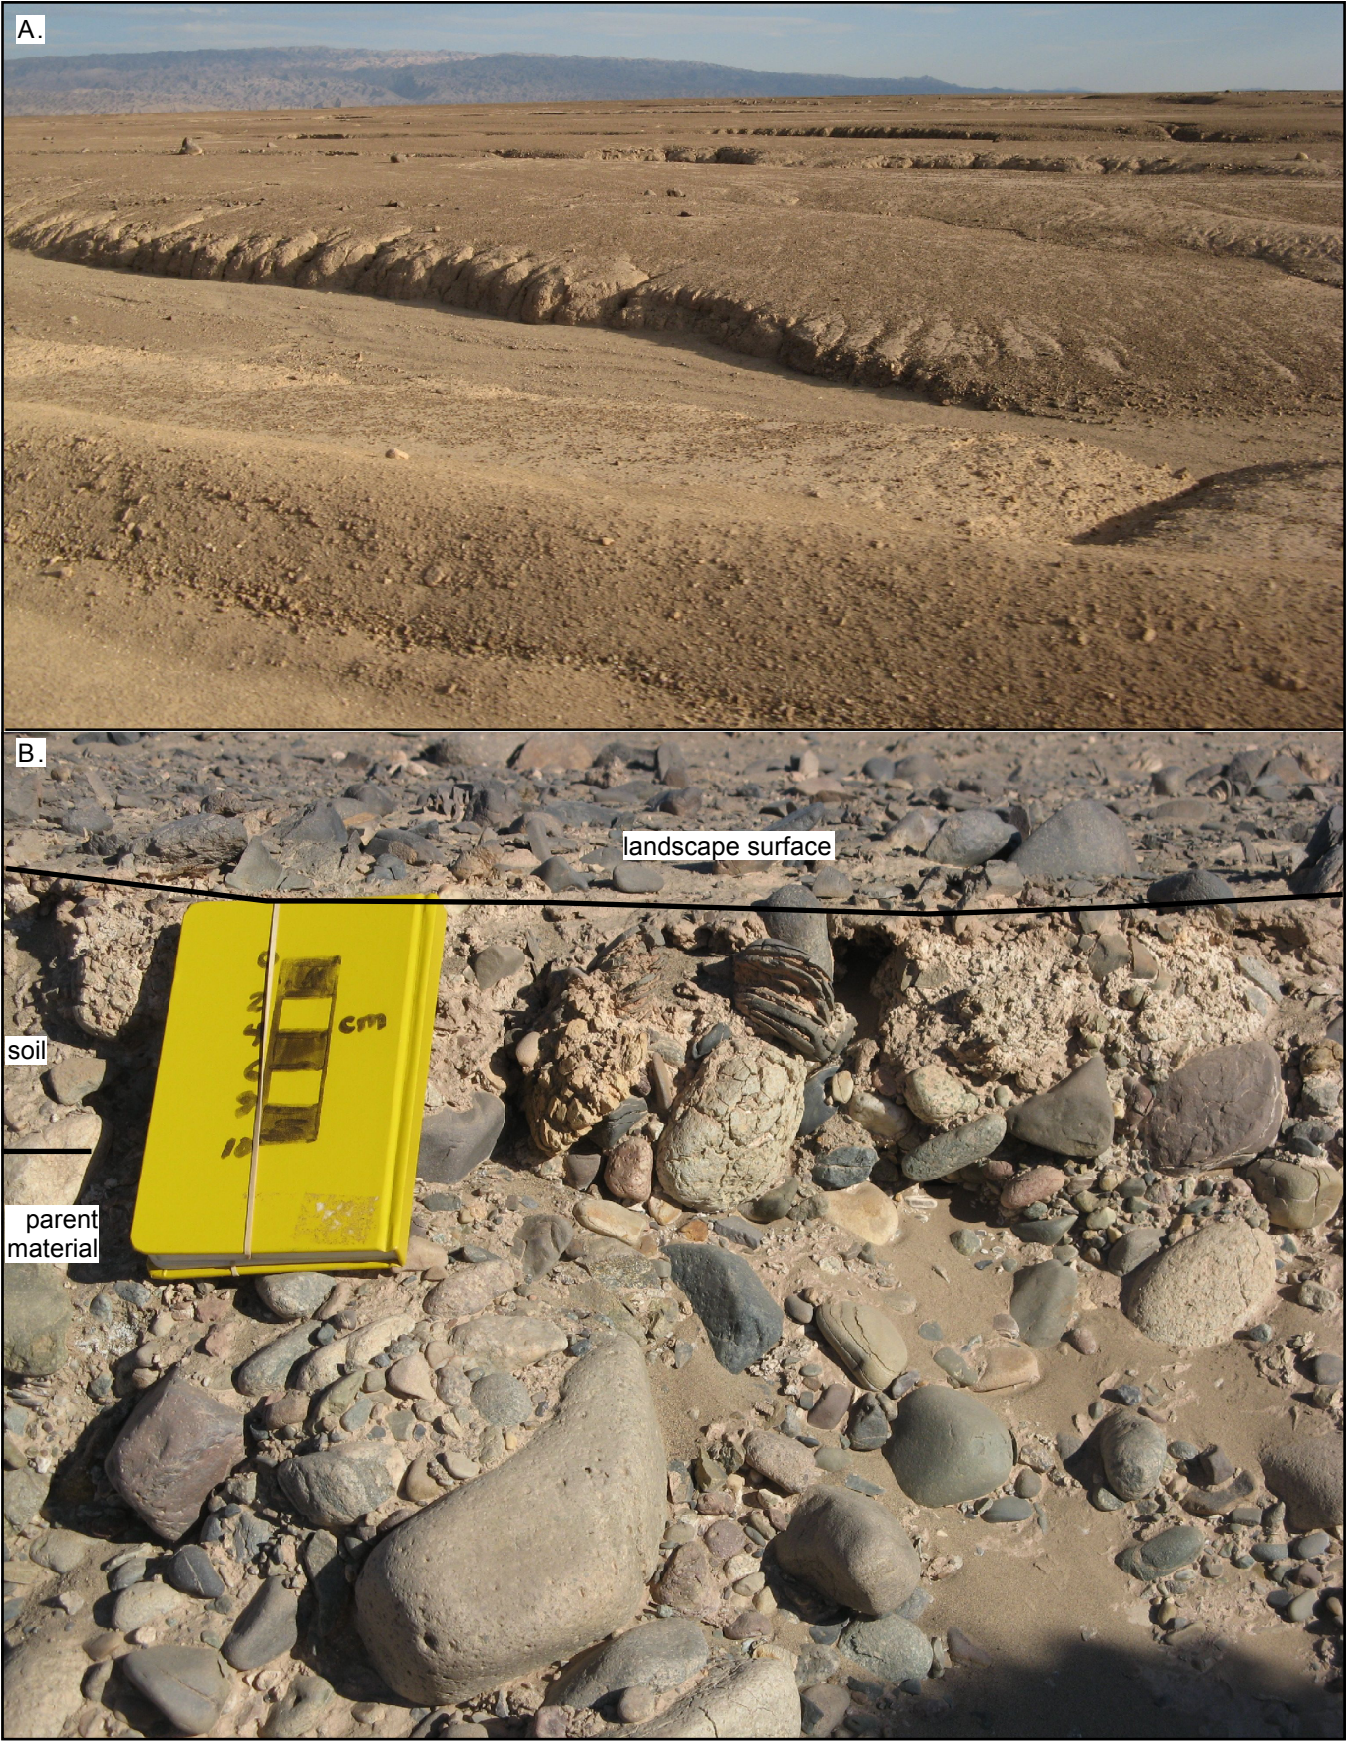



Figure DR-3: Photographs of a Stage NIII surface (A) and soil (B) in the southern Pampa del Tamarugal basin. A) is a view east across a very smooth surface. The light toned patches have a millimeter-thick crust of gypsum (or anhydrite) cemented medium-grained sand, and dark patches are desert-varnished pebbles and cobbles. B) is a cliff-exposure of the soil drawn in Figure 10B. The parent for this soil is alluvium of the “lowland piedmont” unit. Locations: A near 21.436°S, 69.208°S; B at 21.435857°S, 69.208310°W.



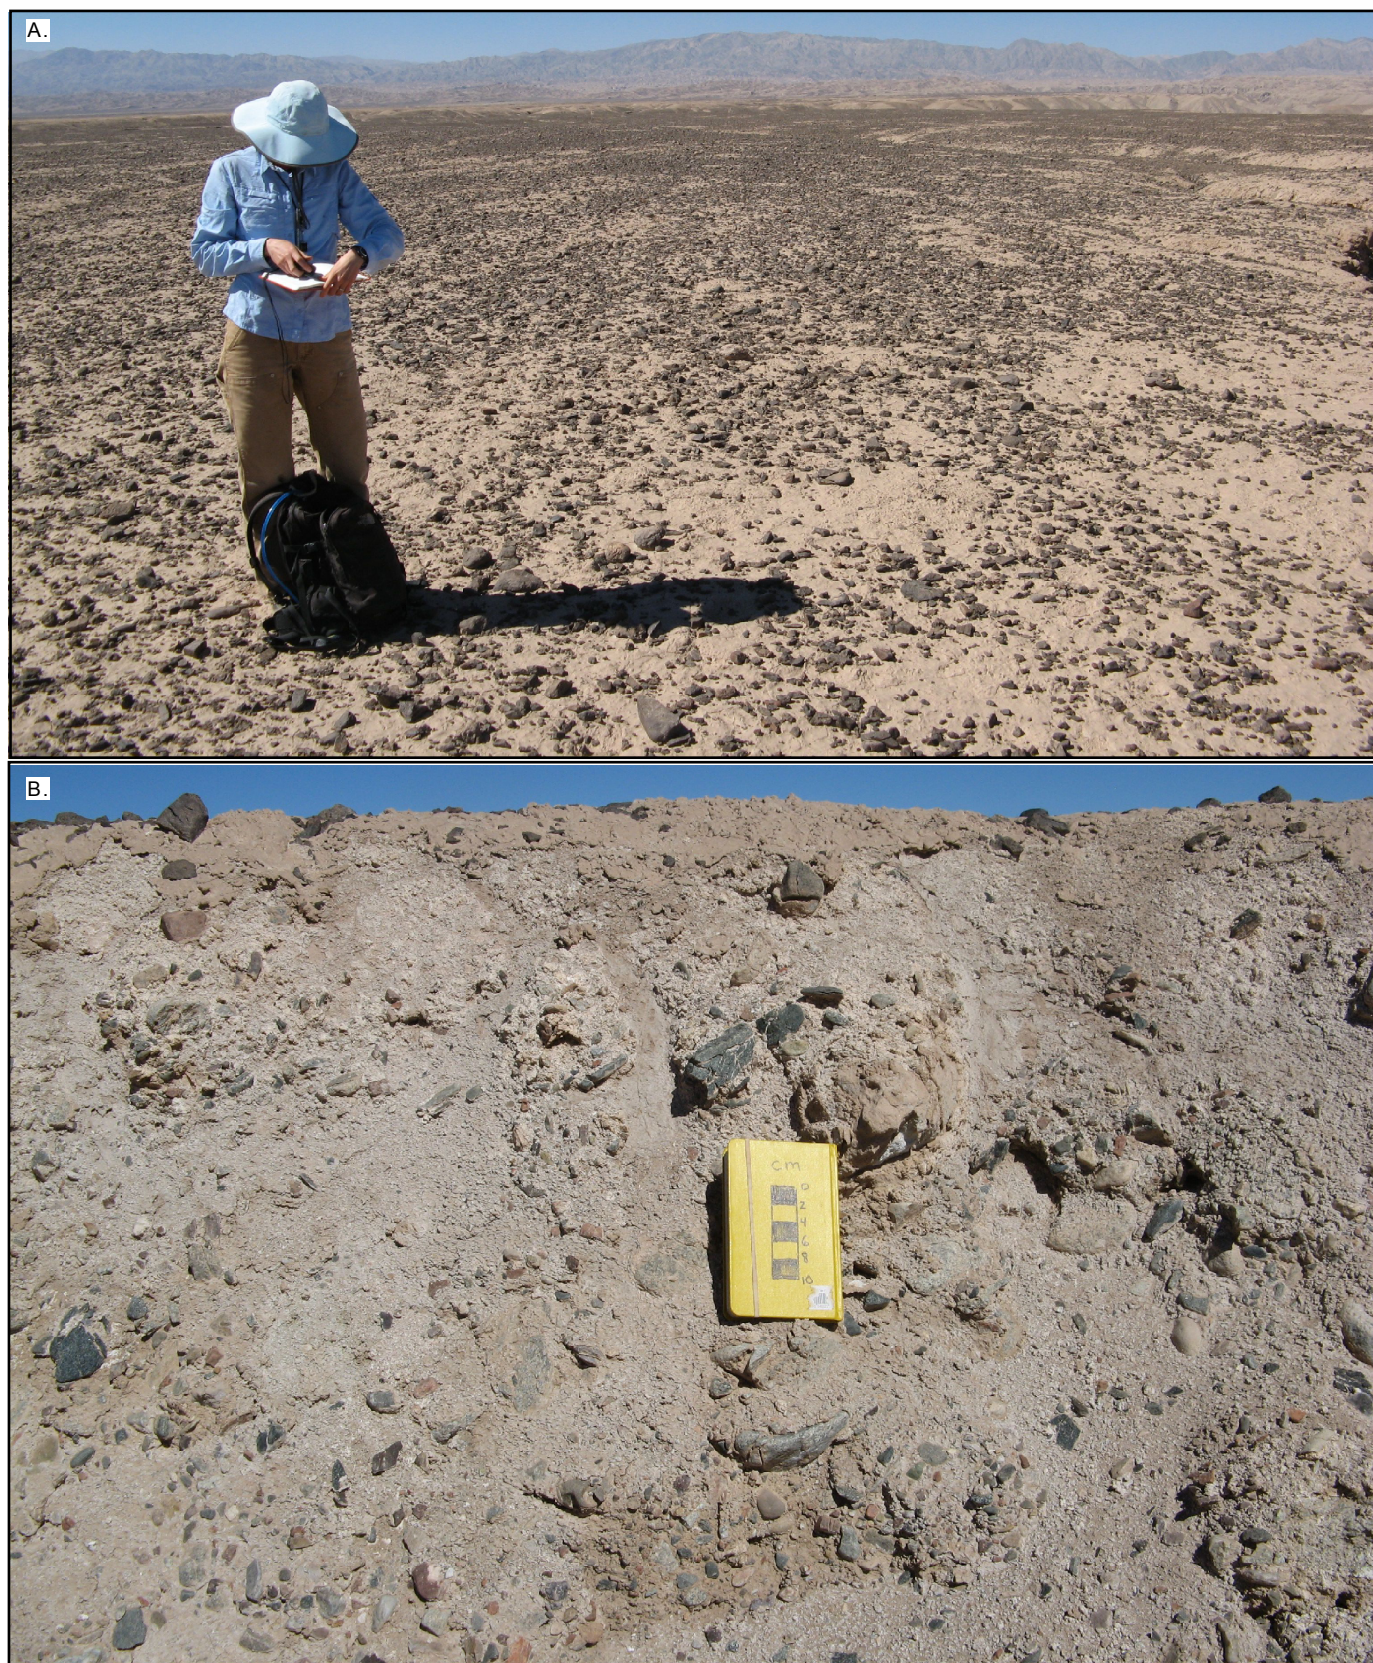



Figure DR-4: Photographs of a Stage NII surface (A) and soil (B) in the southern Pampa del Tamarugal basin. A) shows this landscape surface which covers small patches of the “piedmont deposit.” There is a concentration of pebbles on the surface, but the underlying sulfate-rich dust is sufficiently cohesive that little dust rises into the air when the surface is disturbed. B) is a gypsic soil found on the Stage NII surface. Locations for both photos: 21.426°S, 69.205°W.

Data Repository Figure DR-4

Jordan et al.

A.

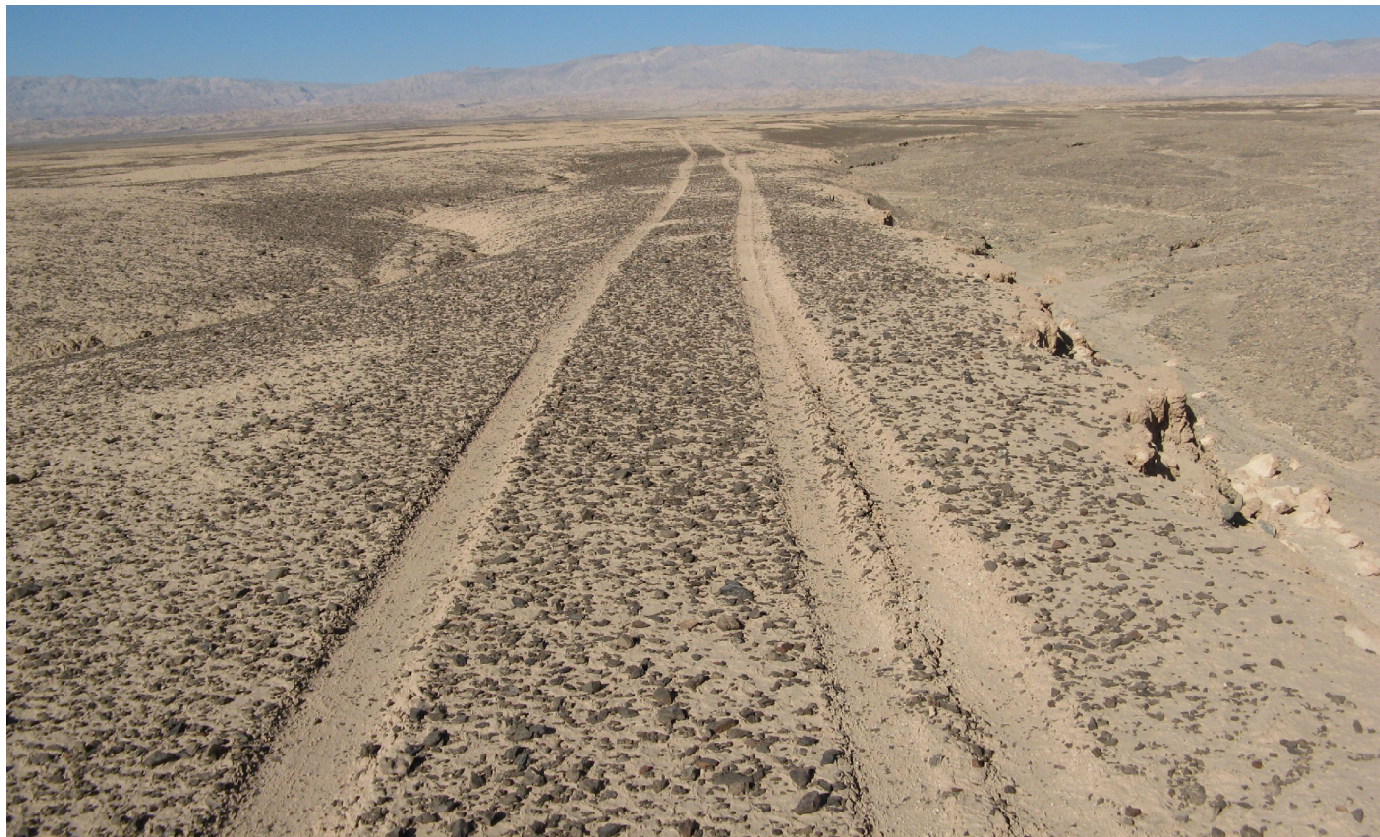

B.

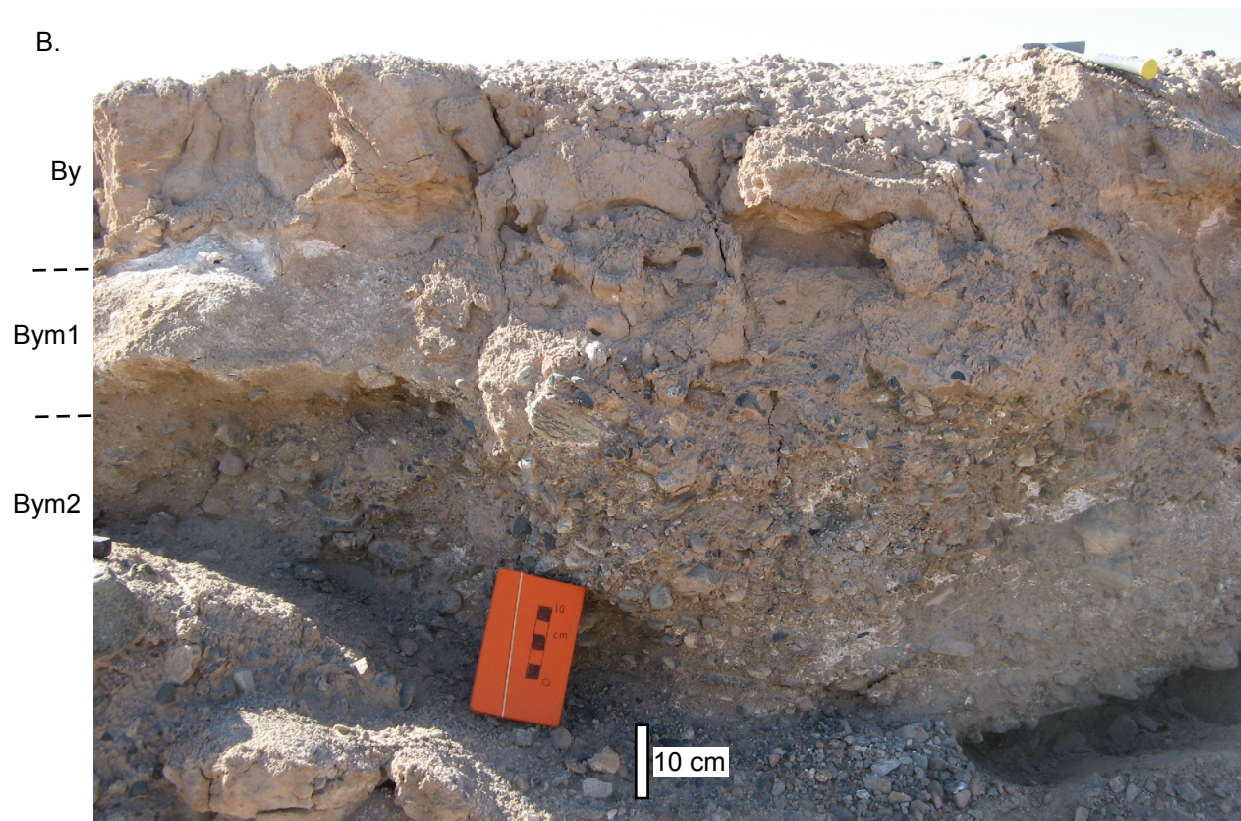



Figure DR-5: Photographs of a Stage NI landscape features in the southern Pampa del Tamarugal basin. A) shows obliquely, and B) is a close-up of, the surface of the sparse remnants of Stage NIb. C) is a close up of the ledge-forming unit within photo A, and illustrates that this indurated horizon is the poorly structured relict of a deeply leached gypsic soil, formed during Stage NIb. This soil profile is shown in Figure 10D. Locations: A and C near 21.4827°S, 69.1376° W; B near 21.477°S, 69.134°W.



Data Repository Figure DR-5

Jordan et al.

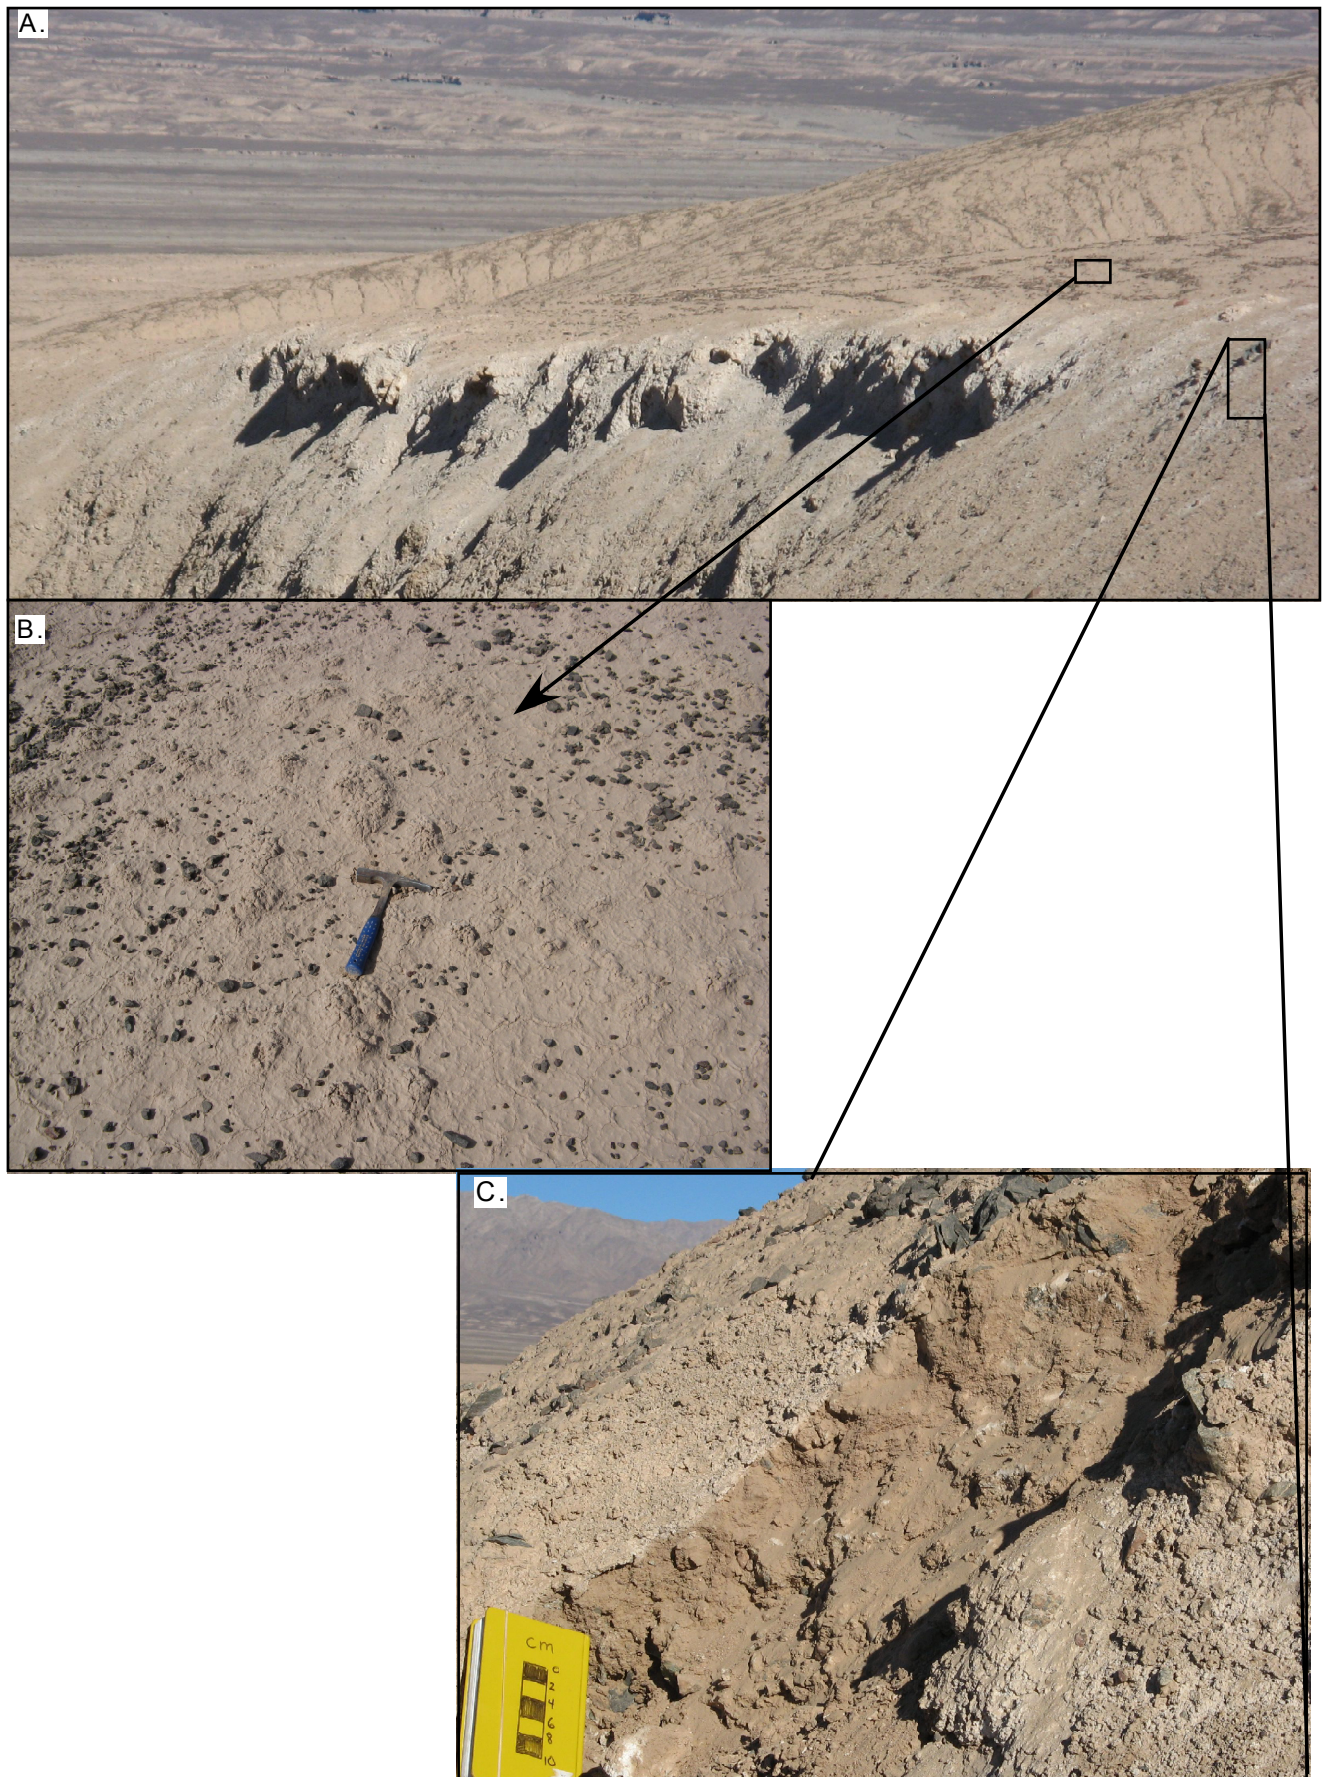

Figure DR-6: Paleosols in the catchment basin of the Chipana fan. A) At the contact between the underlying Middle Miocene El Diablo Formation and overlying Upper Miocene “old eolian deposits” (Blanco P. and Tomlinson, 2013), gypsum columns (white) occur in a 25-cm-thick bed of gravelly sandstone that lacks primary sedimentary structures (Location: 20.8548°S, 69.1171°W). The columns are dominantly gypsum with traces of halite and nitrate (Table 4, sample 09TJ-13). The columns are interpreted to be the remnants of salt pendants that would have originally been found under gravel clasts in a mature gypsic soil. Other patches of gypsum of similar thickness but only a few tens of meters of lateral extent occur sparsely along the stratigraphic contact. Scale on notebook is 10 cm. A nearby (~260 m horizontal distance) volcanic tuff located ~50 m higher in stratigraphic position was dated  $9.7 \pm 0.4$  Ma (Table 1) (Blanco P. and Tomlinson, 2013). B) weakly consolidated, ~50 cm thick Gypsisol (arrow indicates stratigraphic horizon of Gypsisol, which is more resistant than surrounding strata), interbedded about 10 m below the top of the Upper Miocene “upland piedmont deposits.” Circles highlight people, who serve as scale. Left set of two people is near location 20.8512°S, 69.1265°W. The soil contains ~25% gypsum with trace amounts of halite and nitrate (Table 4, Chip 1 and Chip 2). The ridgeline above the Gypsisol (note two people on ridge) exposes an unconsolidated ash flow deposit. A nearby welded ash flow tuff in a similar landscape position and 1.6 km distant was dated  $8.1 \pm 0.4$  Ma (Table 1) (Blanco P. and Tomlinson, 2013).

#### REFERENCE CITED

Blanco P., N., and Tomlinson, A. J., 2013, Carta Guatacondo, Región de Tarapacá: Santiago, Chile, Servicio Nacional de Geología y Minería, Chile, Subdirección Nacional de Geología Carta Geológica de Chile, Serie Geología Basica 15, 109 p., 1 map 1:100,000 .



Data Repository Figure DR-6

Jordan et al.,

A.

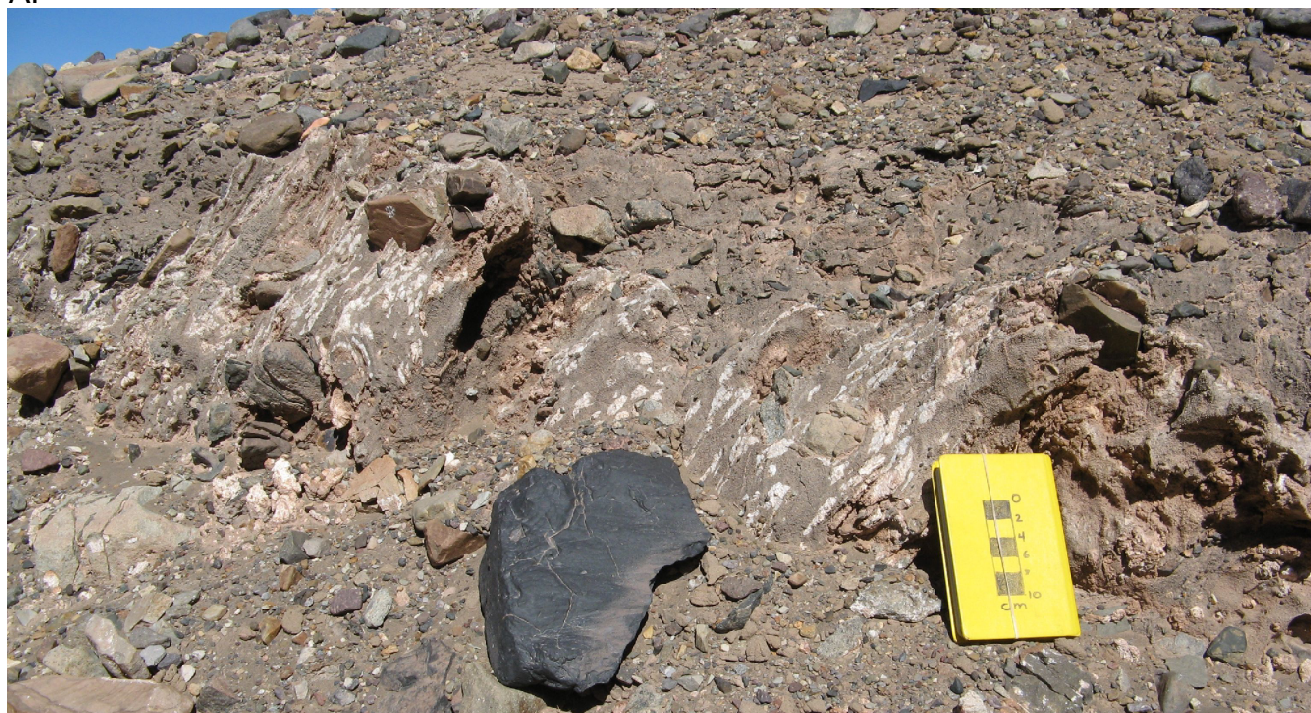

B.

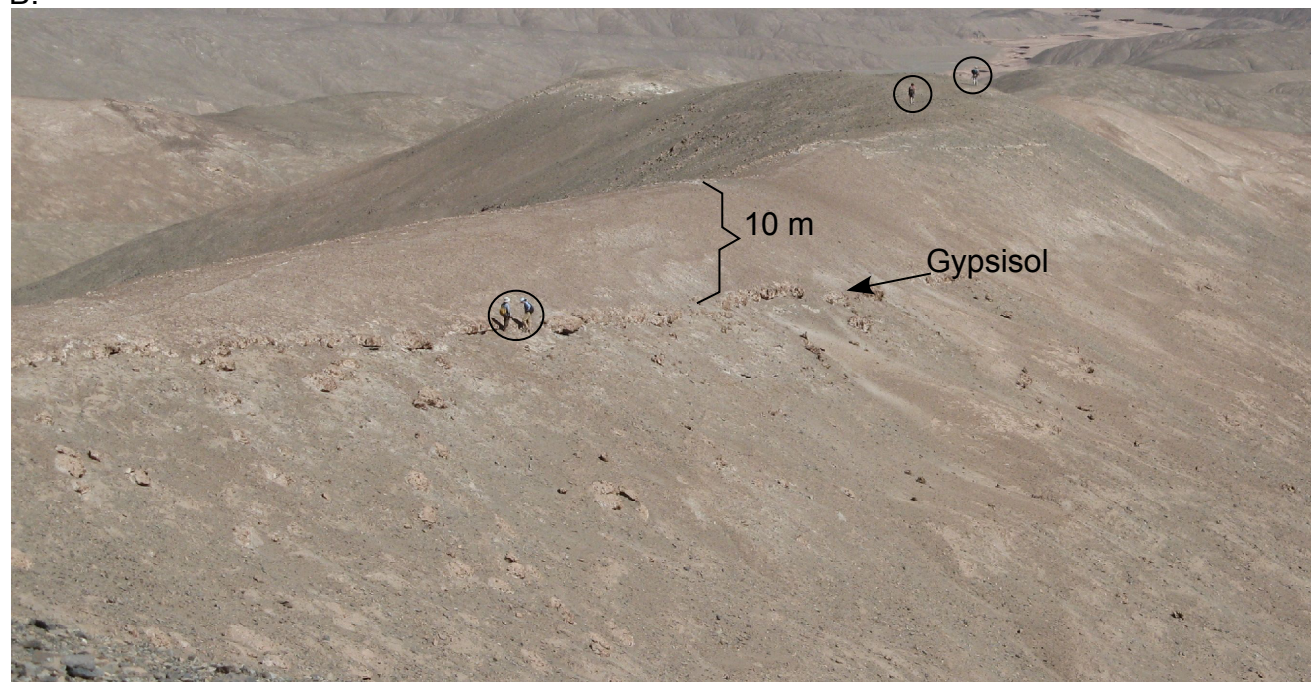

Supplement: Supplementary file 1 [file 23297141]
